# Supplementary material for: The Norwegian Adaptation of the Big Five Inventory-2
Source: PubMed Central journal article supplement (PMC9158541; doi:10.3389/fpsyg.2022.858920), 2022-05-18
Supplement: Table_1.pdf [file Table_1.pdf]

**Supplementary Table 1**

*Factor loadings from RI-EFA of item scores from the BFI-2*

| Item  | E           | A           | C           | N    | O    | ARS |
|-------|-------------|-------------|-------------|------|------|-----|
| BFI1  | <b>.60</b>  | -.24        | .07         | -.01 | .01  | .11 |
| BFI6  | <b>.59</b>  | .23         | -.05        | -.29 | .11  | .10 |
| BFI11 | <b>-.48</b> | .35         | .05         | -.09 | -.06 | .10 |
| BFI16 | <b>-.50</b> | .03         | -.11        | -.03 | .09  | .11 |
| BFI21 | <b>.66</b>  | .21         | -.03        | .01  | .10  | .10 |
| BFI26 | <b>-.23</b> | -.04        | <b>.23</b>  | .16  | -.01 | .10 |
| BFI31 | <b>-.62</b> | .05         | .05         | .10  | -.02 | .08 |
| BFI36 | <b>-.41</b> | -.05        | -.02        | .11  | -.12 | .11 |
| BFI41 | <b>.59</b>  | -.15        | -.08        | -.19 | -.02 | .11 |
| BFI46 | <b>.65</b>  | -.20        | .02         | .14  | .00  | .10 |
| BFI51 | <b>-.49</b> | -.16        | .09         | .03  | -.25 | .10 |
| BFI56 | <b>.56</b>  | -.25        | .01         | .06  | .11  | .11 |
| BFI2  | .10         | <b>-.68</b> | .09         | .23  | .04  | .12 |
| BFI7  | -.07        | <b>-.39</b> | -.19        | -.06 | .08  | .20 |
| BFI12 | .11         | <b>.45</b>  | .03         | .33  | -.08 | .10 |
| BFI17 | -.08        | <b>.60</b>  | -.07        | -.06 | -.06 | .10 |
| BFI22 | .34         | <b>.36</b>  | .16         | .16  | .06  | .10 |
| BFI27 | .08         | <b>-.41</b> | .06         | -.20 | .09  | .10 |
| BFI32 | .10         | <b>-.47</b> | -.10        | -.01 | .13  | .14 |
| BFI37 | .23         | <b>.46</b>  | .27         | .25  | -.05 | .09 |
| BFI42 | -.08        | <b>.39</b>  | .02         | .34  | .11  | .10 |
| BFI47 | -.04        | <b>.70</b>  | .08         | -.06 | .02  | .09 |
| BFI52 | -.06        | <b>-.46</b> | -.09        | -.08 | .02  | .19 |
| BFI57 | .16         | <b>-.52</b> | .07         | -.19 | -.04 | .10 |
| BFI3  | .01         | -.10        | <b>.75</b>  | -.01 | .09  | .09 |
| BFI8  | -.14        | .05         | <b>.54</b>  | .13  | .01  | .09 |
| BFI13 | .00         | -.18        | <b>-.46</b> | -.01 | -.05 | .16 |
| BFI18 | -.03        | .08         | <b>-.73</b> | .21  | -.01 | .10 |
| BFI23 | -.20        | .02         | <b>.45</b>  | .15  | .01  | .10 |

|       |      |      |             |             |             |     |
|-------|------|------|-------------|-------------|-------------|-----|
| BFI28 | .04  | .01  | <b>.64</b>  | .02         | -.09        | .10 |
| BFI33 | .00  | .03  | <b>-.73</b> | .12         | .02         | .10 |
| BFI38 | .37  | .03  | <b>-.46</b> | -.07        | .01         | .12 |
| BFI43 | .11  | -.23 | <b>-.34</b> | -.07        | .07         | .17 |
| BFI48 | .03  | .06  | <b>.56</b>  | -.06        | -.01        | .10 |
| BFI53 | .16  | -.02 | <b>-.43</b> | -.16        | .07         | .12 |
| BFI58 | .11  | .14  | <b>.61</b>  | .11         | .01         | .09 |
| BFI4  | .08  | .15  | .05         | <b>-.60</b> | .05         | .09 |
| BFI9  | .16  | -.11 | -.04        | <b>-.49</b> | .10         | .10 |
| BFI14 | .15  | .09  | .08         | <b>.66</b>  | -.07        | .08 |
| BFI19 | -.07 | .00  | -.07        | <b>.63</b>  | -.03        | .10 |
| BFI24 | .33  | .06  | -.05        | <b>-.50</b> | .09         | .10 |
| BFI29 | -.17 | .08  | .04         | <b>-.84</b> | .03         | .08 |
| BFI34 | -.07 | -.10 | -.10        | <b>.74</b>  | .02         | .08 |
| BFI39 | -.10 | .09  | .02         | <b>.81</b>  | .13         | .09 |
| BFI44 | -.09 | .08  | -.07        | <b>-.67</b> | .05         | .10 |
| BFI49 | .13  | .16  | .08         | <b>-.66</b> | .02         | .08 |
| BFI54 | -.14 | .17  | .04         | <b>.77</b>  | .09         | .08 |
| BFI59 | .37  | .13  | .11         | <b>.56</b>  | -.04        | .08 |
| BFI5  | .08  | .08  | -.04        | -.08        | <b>-.56</b> | .08 |
| BFI10 | .19  | -.15 | .03         | -.03        | <b>.46</b>  | .12 |
| BFI15 | .16  | .15  | -.15        | -.15        | <b>.54</b>  | .10 |
| BFI20 | -.13 | -.02 | -.01        | .05         | <b>.69</b>  | .08 |
| BFI25 | .01  | -.12 | -.02        | .11         | <b>-.38</b> | .09 |
| BFI30 | -.09 | .03  | -.06        | .04         | <b>-.62</b> | .09 |
| BFI35 | -.04 | -.06 | .01         | .11         | <b>.68</b>  | .09 |
| BFI40 | -.13 | .02  | .01         | .23         | <b>.44</b>  | .10 |
| BFI45 | -.04 | .12  | .00         | .01         | <b>-.36</b> | .12 |
| BFI50 | .03  | .16  | .01         | -.12        | <b>-.57</b> | .07 |
| BFI55 | .05  | .00  | -.02        | .12         | <b>-.50</b> | .10 |
| BFI60 | .26  | .09  | .05         | -.12        | <b>.59</b>  | .10 |

*Note.* E = Extraversion, A = Agreeableness, C = Conscientiousness, N = Negative Emotionality, O = Open-Mindedness, and ARS = Acquiescent Response Style. The strongest factor loading for each item is bolded.
